# Supplementary material
Source: PubMed Central journal article supplement (PMC3416373)
Supplement: supp_78.14.4949_AEM07759-11_TableS1.pdf [file supp_78.14.4949_AEM07759-11_TableS1.pdf]

| Table S1 Information of tested cattle |             |                                   |            |             |                             |                             |
|---------------------------------------|-------------|-----------------------------------|------------|-------------|-----------------------------|-----------------------------|
| Animal id                             | RFI ranking | RFI value (Kg day <sup>-1</sup> ) | Age (days) | Weight (Kg) | DMI (Kg day <sup>-1</sup> ) | ADG (Kg day <sup>-1</sup> ) |
| 224                                   | H           | 0.445                             | 227        | 317.7       | 7.295                       | 0.265                       |
| 274                                   | H           | 0.442                             | 250        | 315.3       | 7.375                       | 0.355                       |
| 328                                   | H           | 0.312811                          | 240        | 322.1       | 11.17236                    | 0.45664                     |
| 375                                   | H           | 0.857                             | 288        | 369.6       | 8                           | 0.35                        |
| 396                                   | H           | 0.332                             | 252        | 307.1       | 8.36                        | 0.275                       |
| 634                                   | H           | 0.347036                          | 228        | 297.4       | 7.136607                    | 0.068182                    |
| 655                                   | H           | 1.866                             | 260        | 370.5       | 9.87                        | 0.185                       |
| 712                                   | H           | 0.822                             | 242        | 298.5       | 8.245                       | 0.475                       |
| 763                                   | H           | 0.573                             | 257        | 319.3       | 7.285                       | 0.14                        |
| 887                                   | H           | 0.547                             | 246        | 338.7       | 8.27                        | 0.315                       |
| 968                                   | H           | 0.757                             | 239        | 261.3       | 6.54                        | 0.425                       |
| 1264                                  | H           | 0.684494                          | 230        | 264.2       | 6.75636                     | 0.237163                    |
| 1453                                  | H           | 0.572                             | 250        | 303.7       | 9.97                        | 0.27                        |
| 1468                                  | H           | 0.667                             | 247        | 291.3       | 7.625                       | 0.3                         |
| 114                                   | L           | -0.54598                          | 241        | 258.3       | 6.68                        | 0.080806                    |
| 219                                   | L           | -0.489                            | 257        | 276.6       | 5.95                        | 0.215                       |
| 329                                   | L           | -1.039                            | 253        | 278.4       | 6.74                        | 0.55                        |
| 431                                   | L           | -0.55669                          | 210        | 284.8       | 7.45                        | 0.598058                    |
| 532                                   | L           | -0.816                            | 225        | 355.5       | 8.29                        | 0.275                       |
| 554                                   | L           | -1.251                            | 257        | 316.3       | 6.38                        | 0.44                        |
| 556                                   | L           | -0.42                             | 240        | 306.9       | 7.72                        | 0.54                        |
| 559                                   | L           | -1.097                            | 230        | 296.5       | 6.86                        | 0.145                       |
| 583                                   | L           | -0.651                            | 285        | 359.7       | 8.57                        | 0.385                       |
| 633                                   | L           | -0.629                            | 226        | 302.8       | 7.18                        | 0.67                        |
| 739                                   | L           | -0.768                            | 284        | 363.9       | 8.38                        | 0.315                       |
| 759                                   | L           | -0.667                            | 261        | 315.3       | 7.94                        | 0.12                        |
| 785                                   | L           | -0.758                            | 236        | 302.1       | 8.72                        | 0.26                        |
| 1196                                  | L           | -0.607                            | 281        | 397.8       | 8.11                        | 0.305                       |
