# Supplementary material
Source: PubMed Central journal article supplement (PMC3416373)
Supplement: supp_78.14.4949_AEM07759-11_TableS2.pdf [file supp_78.14.4949_AEM07759-11_TableS2.pdf]

**Table S2.** Effect of RFI phenotype and diet on physiological and rumen fermentation variables of beef heifers\*

|                                    | HF diet |       |                         |        |       |       |                         |        | LF diet |       |                         |        |       |       |                         |        |
|------------------------------------|---------|-------|-------------------------|--------|-------|-------|-------------------------|--------|---------|-------|-------------------------|--------|-------|-------|-------------------------|--------|
|                                    | HRFI    | SD    | 95% Confidence interval |        | LRFI  | SD    | 95% Confidence interval |        | HRFI    | SD    | 95% Confidence interval |        | LRFI  | SD    | 95% Confidence interval |        |
|                                    |         |       | upper                   | lower  |       |       | upper                   | lower  |         |       | upper                   | lower  |       |       | upper                   | lower  |
| DMI <sup>1</sup> kg/d              | 5.7     | 1.28  | 4.91                    | 6.46   | 5.4   | 0.84  | 4.88                    | 5.85   | 10.4    | 1.48  | 9.54                    | 11.33  | 9.6   | 1.17  | 8.95                    | 10.3   |
| RFI kg/d                           | 0.7     | 0.39  | 0.45                    | 0.92   | -0.7  | 0.24  | -0.88                   | -0.60  | 0.7     | 0.36  | 0.44                    | 0.92   | -0.7  | 0.24  | -0.88                   | -0.60  |
| ADG kg/d                           | 0.1     | 0.12  | -0.06                   | 0.09   | 0.1   | 0.33  | -0.12                   | 0.26   | 0.6     | 0.09  | 0.52                    | 0.63   | 0.6   | 0.11  | 0.57                    | 0.70   |
| CH <sub>4</sub> <sup>2</sup> g/d   | 130.5   | 30.85 | 111.85                  | 149.13 | 142.2 | 19.66 | 130.83                  | 153.53 | 189.8   | 31.75 | 170.57                  | 208.94 | 203.9 | 32.57 | 185.10                  | 222.71 |
| MLW <sup>3</sup> kg                | 80.0    | 6.12  | 76.31                   | 83.71  | 80.7  | 7.17  | 76.57                   | 84.85  | 92.7    | 6.46  | 88.76                   | 96.57  | 93.8  | 5.69  | 90.48                   | 97.05  |
| Total VFA <sup>4</sup> mmol        | 120.0   | 15.03 | 110.92                  | 129.09 | 112.9 | 22.70 | 99.8                    | 126.01 | 151.6   | 34.61 | 130.66                  | 172.49 | 149.8 | 24.12 | 135.87                  | 163.72 |
| Acetate mmol/mol                   | 653.8   | 20.17 | 641.63                  | 666.01 | 671.0 | 17.71 | 660.73                  | 681.19 | 658.1   | 27.85 | 641.28                  | 674.94 | 656.8 | 33.17 | 637.63                  | 675.93 |
| Propionate mmol/mol                | 228.8   | 13.92 | 220.42                  | 237.24 | 207.0 | 12.54 | 199.75                  | 214.24 | 200.7   | 31.33 | 181.76                  | 219.62 | 202.7 | 34.19 | 182.96                  | 222.44 |
| Isobutyrate mmol/mol               | 7.9     | 1.15  | 7.16                    | 8.55   | 7.9   | 1.50  | 7.07                    | 8.79   | 4.6     | 1.03  | 3.94                    | 5.18   | 4.9   | 1.11  | 4.30                    | 5.58   |
| Butyrate mmol/mol                  | 83.2    | 4.49  | 80.53                   | 85.96  | 87.2  | 7.26  | 82.97                   | 91.35  | 117.2   | 15.94 | 107.59                  | 126.85 | 111.1 | 14.68 | 102.65                  | 119.60 |
| Isovalerate mmol/mol               | 10.7    | 2.43  | 9.23                    | 12.16  | 12.5  | 3.87  | 10.27                   | 14.73  | 6.9     | 1.18  | 6.16                    | 7.58   | 9.3   | 3.47  | 7.28                    | 11.29  |
| Valerate mmol/mol                  | 15.6    | 1.87  | 14.42                   | 16.69  | 14.5  | 2.30  | 13.13                   | 15.78  | 12.6    | 3.22  | 10.61                   | 14.50  | 15.2  | 9.26  | 9.83                    | 20.52  |
| A:P <sup>5</sup> mmol/mol          | 2.9     | 0.25  | 2.72                    | 3.02   | 3.3   | 0.27  | 3.10                    | 3.41   | 3.4     | 0.54  | 3.03                    | 3.68   | 3.3   | 0.67  | 2.96                    | 3.73   |
| pH                                 | 7.1     | 0.32  | 6.92                    | 7.30   | 7.2   | 0.31  | 6.97                    | 7.33   | 6.3     | 0.31  | 6.13                    | 6.51   | 6.4   | 0.21  | 6.29                    | 6.54   |
| CH <sub>4</sub> % GEI <sup>6</sup> | 6.0     | 0.32  | 5.08                    | 6.98   | 7.0   | 1.54  | 6.06                    | 7.84   | 5.2     | 1.10  | 4.54                    | 5.87   | 6.0   | 0.90  | 5.47                    | 6.51   |
| DMD <sup>7</sup> g/kg DM           | 635.0   | 27.40 | 618.48                  | 651.57 | 663.3 | 42.3  | 638.89                  | 687.75 | 713.0   | 25.62 | 696.76                  | 729.31 | 721.3 | 27.62 | 705.37                  | 797.27 |
| OMD <sup>8</sup> g/kg DM           | 643.5   | 30.80 | 624.85                  | 662.08 | 676.5 | 40.89 | 652.89                  | 700.11 | 733.3   | 25.61 | 717.01                  | 749.55 | 742.0 | 27.92 | 725.89                  | 758.14 |
| CPD <sup>9</sup> g/kg DM           | 436.8   | 45.56 | 409.24                  | 464.30 | 483.4 | 74.08 | 440.66                  | 526.20 | 648.2   | 28.01 | 630.42                  | 666.02 | 655.1 | 23.32 | 641.68                  | 668.61 |
| NDFD <sup>10</sup> g/kg DM         | 668.0   | 86.75 | 615.61                  | 720.45 | 673.9 | 39.35 | 651.14                  | 696.59 | 558.7   | 47.52 | 528.5                   | 588.9  | 584.3 | 53.47 | 553.39                  | 615.13 |
| ADFD <sup>11</sup> g/kg DM         | 669.2   | 88.33 | 615.86                  | 722.61 | 675.9 | 37.90 | 654.01                  | 697.77 | 427.5   | 60.6  | 388.96                  | 466.01 | 446.4 | 73.55 | 403.88                  | 488.81 |
| GED <sup>12</sup> KJ/MJ            | 638.5   | 32.75 | 616.48                  | 660.49 | 667.0 | 42.44 | 641.39                  | 692.6  | 709.0   | 27.87 | 689.03                  | 728.91 | 719.5 | 26.89 | 703.97                  | 735.03 |

\*n= 28, 14 H-RFI and 14 L-RFI animals

HF = high forage, LF = low forage

H = high, L= low

RFI = residual feed intake

<sup>1</sup>Dry matter intake, <sup>2</sup>Methane, <sup>3</sup>Mean live weight, <sup>4</sup>Total volatile fatty acids, <sup>5</sup>Acetate:propionate ratio, <sup>6</sup>Methane energy from gross energy intake, <sup>7</sup>Dry matter digestibility, <sup>8</sup>Organic matter digestibility, <sup>9</sup>Crude protein digestibility, <sup>10</sup>Neutral detergent fiber digestibility, <sup>11</sup>Acid detergent fiber digestibility, <sup>12</sup>Gross energy digestibility
